# Supplementary material
Source: PubMed Central journal article supplement (PMC4018118)
Supplement: mp400740c_si_001.pdf [file mp400740c_si_001.pdf]

Supporting Information for

*In Vivo* Performance of a Novel Fluorinated  
Magnetic Resonance Imaging Agent for Functional  
Analysis of Bile Acid Transport

*Diana Vivian<sup>†</sup>, Kunrong Cheng<sup>‡</sup>, Sandeep Khurana<sup>‡</sup>, Su Xu<sup>§</sup>, Edwin H. Kriel<sup>||</sup>, Paul A. Dawson<sup>⊥</sup>,  
Jean-Pierre Raufman<sup>‡,\*</sup> and James E. Polli<sup>†,\*</sup>*

<sup>†</sup>Department of Pharmaceutical Sciences, University of Maryland School of Pharmacy, Baltimore, Maryland 21230, United States.

<sup>‡</sup>Department of Medicine, University of Maryland School of Medicine, Baltimore, Maryland 21230, United States.

<sup>§</sup>Department of Diagnostic Radiology and Nuclear Medicine, University of Maryland School of Medicine, Baltimore, Maryland 21230, United States.

<sup>||</sup> Department of Pathology, University of Maryland School of Medicine, Baltimore, Maryland 21230, United States.

<sup>⊥</sup>Department of Internal Medicine, Wake Forest School of Medicine, Winston-Salem, North Carolina 27157, United States.

Correspondence should be addressed to J-P.R. (jraufman@medicine.umaryland.edu) or J.E.P. (jpolli@rx.umaryland.edu).

**Figure S1**  $^{19}\text{F}$  MRI of ex-vivo phantoms of 10 mM CA-lys-TFA dissolved in different solvents. Average ROI signal intensities relative to human bile were 94.2, 83.5, and 109.4 in methanol, DMSO, and 1:1 PEG:DPBS, respectively.

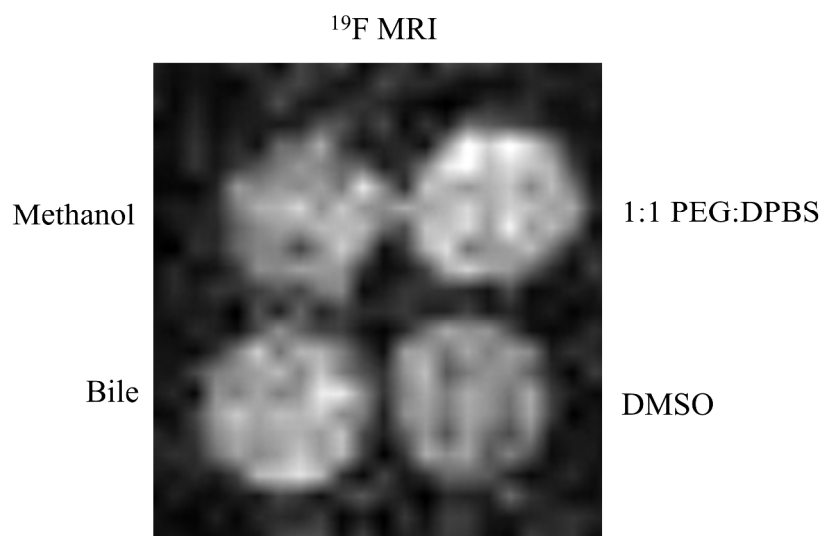

**Figure S2** Comparison of gallbladder CA-lys-TFA concentrations calculated from  $^{19}\text{F}$  MRI signal intensity to those measured by LC/MS/MS. This figure similar to Figure 4, but where data at the origin (0,0) has been excluded and where an intercept is not fitted. (A) Calculation of  $^{19}\text{F}$  MRI signal intensity in the gallbladders of live, anesthetized mice was accomplished by comparison to the  $^{19}\text{F}$  MRI signal intensity of a 30-mM CA-lys-TFA phantom.  $^{19}\text{F}$  image acquisition was 1.5 h. CA-lys-TFA content in gallbladder bile by LC/MS/MS was measured after MRI. Each data point represents results from one mouse; MRI-based and LC/MS/MS-based measurements are paired ( $n = 10$  mice). Linear regression analysis (solid line) yielded  $R^2 = 0.896$ ,  $P = 0.00003$ , indicating association between MRI-based and LC/MS/MS-determined values. The line of unity is dashed. (B) Comparison of CA-lys-TFA measurements obtained from MRI and LC/MS/MS after applying a 2.7-correction factor to LC/MS/MS values to account for a post-MRI effect. The line of unity is dashed, while the line from regression is solid ( $R^2=0.896$ ). The slope from linear regression is 1.12, i.e. 2.7-fold lower than the regressed slope in Fig. S2A.

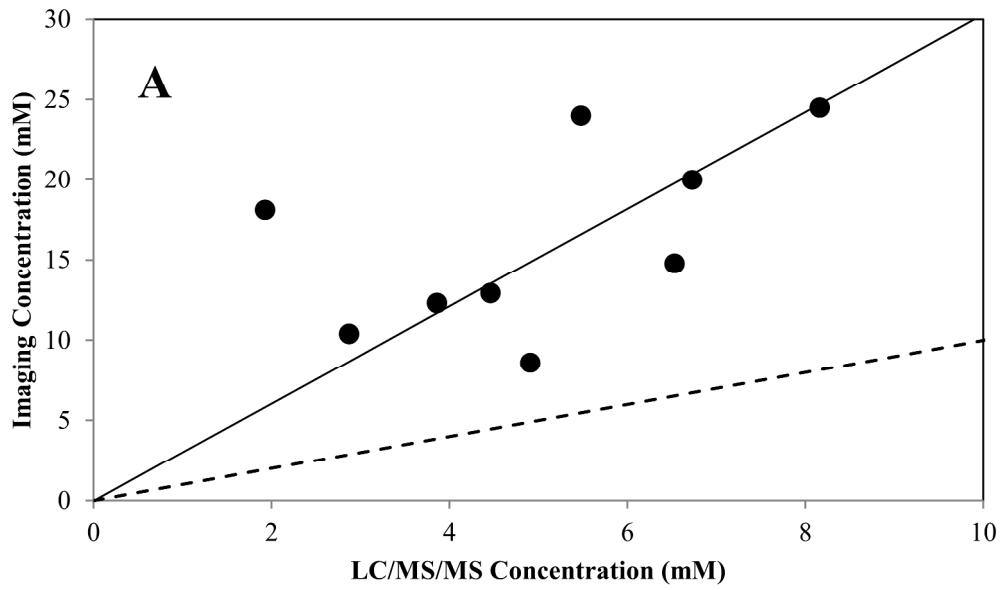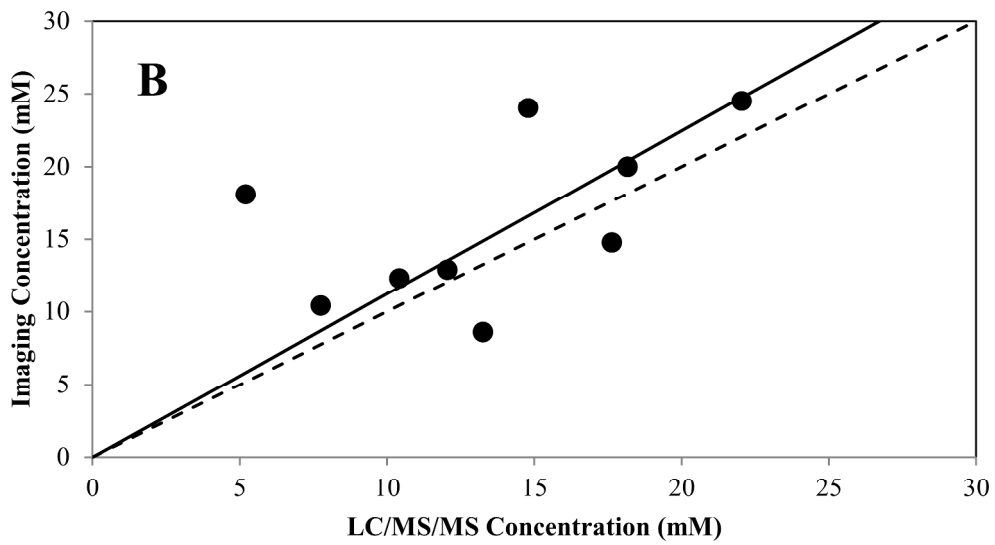

**Table S1** T1 relaxation times and Relative signal intensity compared to human bile of 10 mM CA-lys-TFA dissolved in methanol, DMSO, 1:1 PEG:DPBS, and human bile.

| Solvent          | Signal Intensity<br>(% Compared to<br>Bile) | T1 (s)        |
|------------------|---------------------------------------------|---------------|
| Methanol         | 94.2                                        | 1.046 ± 0.100 |
| DMSO             | 83.5                                        | 0.667 ± 0.102 |
| 1:1 PEG:<br>DPBS | 109.4                                       | 0.629 ± 0.059 |
| Bile             | 100                                         | 0.380 ± 0.013 |

**Table S2** Liver and plasma CA-lys-TFA concentrations in mice 1-14, measured by LC/MS/MS after euthanasia.

| Mouse | Dose        | Time of Euthanasia (h) | Liver [CA-lys-TFA] ( $\mu$ M) | Plasma [CA-lys-TFA] ( $\mu$ M) |
|-------|-------------|------------------------|-------------------------------|--------------------------------|
| 1     | 150 mg/kg   | 5.0                    | 3.83                          | 0.10                           |
| 2     | 150 mg/kg   | 51.4                   | 0.76                          | 0.02                           |
| 3     | 150 mg/kg   | 2.8                    | 7.40                          | 15.90                          |
| 4     | 150 mg/kg   | 8.6                    | 8.99                          | 16.56                          |
| 5     | 150 mg/kg   | 8.5                    | 1.97                          | 0.07                           |
| 6     | 150 mg/kg   | 53.0                   | 0.71                          | 0.04                           |
| 7     | 150 mg/kg   | 8.4                    | 3.73                          | 1.28                           |
| 8     | 50 mg/kg 7x | 4                      | 10.66                         | 0.05                           |
| 9     | 50 mg/kg 7x | 3.5                    | 14.02                         | 0.02                           |
| 10    | 50 mg/kg 7x | 8.9                    | 1.63                          | 0.02                           |
| 11    | 150 mg/kg   | 8.5                    | 22.97                         | 0.20                           |
| 12    | 150 mg/kg   | 8.5                    | 7.92                          | 0.18                           |
| 13    | 150 mg/kg   | 8.5                    | 6.96                          | 0.09                           |
| 14    | 150 mg/kg   | 8.5                    | 6.55                          | 0.42                           |

**Table S3** Gallbladder, liver and plasma concentrations of CA-lys-TFA in WT and *Slc10a2*<sup>-/-</sup> mice. Mice 15-18 and 20-23 were euthanized without imaging 7 h after gavage, whereas mice 19 and 24 were imaged and euthanized 8.5 h after oral gavage with 150 mg/kg CA-lys-TFA. In general, CA-lys-TFA concentrations in WT mice were substantially greater than those in *Slc10a2*<sup>-/-</sup> mice.

|                               | Mouse | Gallbladder<br>[CA-lys-TFA]<br>(mM) | Liver<br>[CA-lys-TFA]<br>( $\mu$ M) | Plasma<br>[CA-lys-TFA]<br>( $\mu$ M) |
|-------------------------------|-------|-------------------------------------|-------------------------------------|--------------------------------------|
| WT                            | 15    | 4.36                                | 7.95                                | 0.78                                 |
|                               | 16    | 12.32                               | 10.28                               | 0.23                                 |
|                               | 17    | 13.95                               | 18.83                               | 0.25                                 |
|                               | 18    | 8.61                                | 17.21                               | 0.42                                 |
|                               | 19    | 4.81                                | 4.49                                | 0.69                                 |
| <i>Slc10a2</i> <sup>-/-</sup> | 20    | 0.30                                | 0.61                                | 0.00                                 |
|                               | 21    | 0.42                                | 0.61                                | 0.17                                 |
|                               | 22    | 0.27                                | 0.63                                | 0.05                                 |
|                               | 23    | 0.28                                | 0.46                                | 0.22                                 |
|                               | 24    | 0.27                                | 1.26                                | 0.52                                 |
